# Supplementary material for: Use of mHealth Technology for Patient-Reported Outcomes in Community-Dwelling Adults with Acquired Brain Injuries: A Scoping Review
Source: Int J Environ Res Public Health. 2021 Feb 23;18(4):2173. doi: 10.3390/ijerph18042173 (PMC7926536; doi:10.3390/ijerph18042173)
Supplement: Supplementary file 1 [file ijerph-18-02173-s001.pdf]

| Supplementary Table 1. Database Search Strategy Terms                                                                                                                                                                                                                                                                                                                                                                                                                                                                                                                                                                                                                                                                                             |     |                                           |
|---------------------------------------------------------------------------------------------------------------------------------------------------------------------------------------------------------------------------------------------------------------------------------------------------------------------------------------------------------------------------------------------------------------------------------------------------------------------------------------------------------------------------------------------------------------------------------------------------------------------------------------------------------------------------------------------------------------------------------------------------|-----|-------------------------------------------|
| Search term                                                                                                                                                                                                                                                                                                                                                                                                                                                                                                                                                                                                                                                                                                                                       | AND | Search term                               |
| brain injuries<br>OR                                                                                                                                                                                                                                                                                                                                                                                                                                                                                                                                                                                                                                                                                                                              | AND | Ecological Momentary Assessment<br>OR     |
| brain hemorrhage<br>OR                                                                                                                                                                                                                                                                                                                                                                                                                                                                                                                                                                                                                                                                                                                            |     | ecologic* momentary assessment*<br>OR     |
| traumatic brain injuries<br>OR                                                                                                                                                                                                                                                                                                                                                                                                                                                                                                                                                                                                                                                                                                                    |     | electronic momentary assessment*<br>OR    |
| diffuse brain injuries<br>OR                                                                                                                                                                                                                                                                                                                                                                                                                                                                                                                                                                                                                                                                                                                      |     | community based assessment*<br>OR         |
| traumatic brain injury<br>OR                                                                                                                                                                                                                                                                                                                                                                                                                                                                                                                                                                                                                                                                                                                      |     | community based outcome assessment*<br>OR |
| chronic epilepsy<br>OR                                                                                                                                                                                                                                                                                                                                                                                                                                                                                                                                                                                                                                                                                                                            |     | community based measures<br>OR            |
| post-traumatic<br>OR                                                                                                                                                                                                                                                                                                                                                                                                                                                                                                                                                                                                                                                                                                                              |     | community based outcome measures<br>OR    |
| cerebrovascular trauma<br>OR                                                                                                                                                                                                                                                                                                                                                                                                                                                                                                                                                                                                                                                                                                                      |     | cell phone<br>OR                          |
| craniocerebral trauma<br>OR                                                                                                                                                                                                                                                                                                                                                                                                                                                                                                                                                                                                                                                                                                                       |     | smartphone<br>OR                          |
| head injuries<br>OR                                                                                                                                                                                                                                                                                                                                                                                                                                                                                                                                                                                                                                                                                                                               |     |                                           |
| closed head injuries<br>OR                                                                                                                                                                                                                                                                                                                                                                                                                                                                                                                                                                                                                                                                                                                        |     |                                           |
| penetrating<br>OR                                                                                                                                                                                                                                                                                                                                                                                                                                                                                                                                                                                                                                                                                                                                 |     |                                           |
| skull fractures<br>OR                                                                                                                                                                                                                                                                                                                                                                                                                                                                                                                                                                                                                                                                                                                             |     |                                           |
| stroke                                                                                                                                                                                                                                                                                                                                                                                                                                                                                                                                                                                                                                                                                                                                            |     |                                           |
| <b>Databases searched:</b> Ovid MEDLINE(R)<1946 to August 16, 2019 & MEDLINE InProcess & Epub & Embase & PsycINFO.<br><b>Keywords were:</b> [brain injuries/brain hemorrhage/traumatic brain injuries/diffuse brain injuries/traumatic brain injury/chronic epilepsy, post-traumatic OR cerebrovascular trauma/craniocerebral trauma/head injuries/closed head injuries/penetrating/skull fractures OR Stroke] AND [Ecological Momentary Assessment OR ecologic* momentary assessment* OR electronic momentary assessment* OR community based assessment* OR community based outcome assessment* OR community based measures OR community based outcome measures OR cell phone OR Smartphone OR Mobile Applications OR mobile health OR mHealth]. |     |                                           |
